# Supplementary material
Source: PubMed Central journal article supplement (PMC7375932)
Supplement: NIHMS1592797-supplement-Supplementary_Material.pdf [file NIHMS1592797-supplement-Supplementary_Material.pdf]

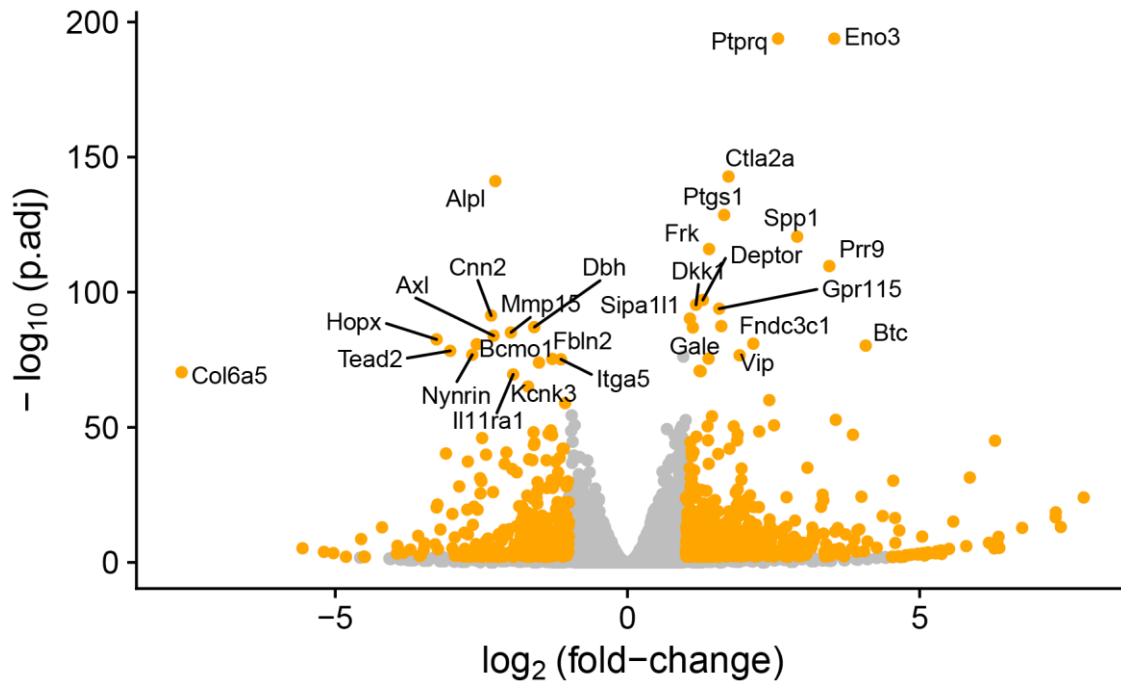

**Figure S1. Differentially expressed genes between control and PFN1 KO cells, related to Figure 1.** Volcano plot of differentially expressed genes upon deletion of PFN1. Criteria for significance is an adjusted p value  $\leq 0.01$  where significance is indicated in orange. Points are labelled based on adjusted p value, the top 15 up-regulated genes and 14 down-regulated genes (after removal of PFN1).

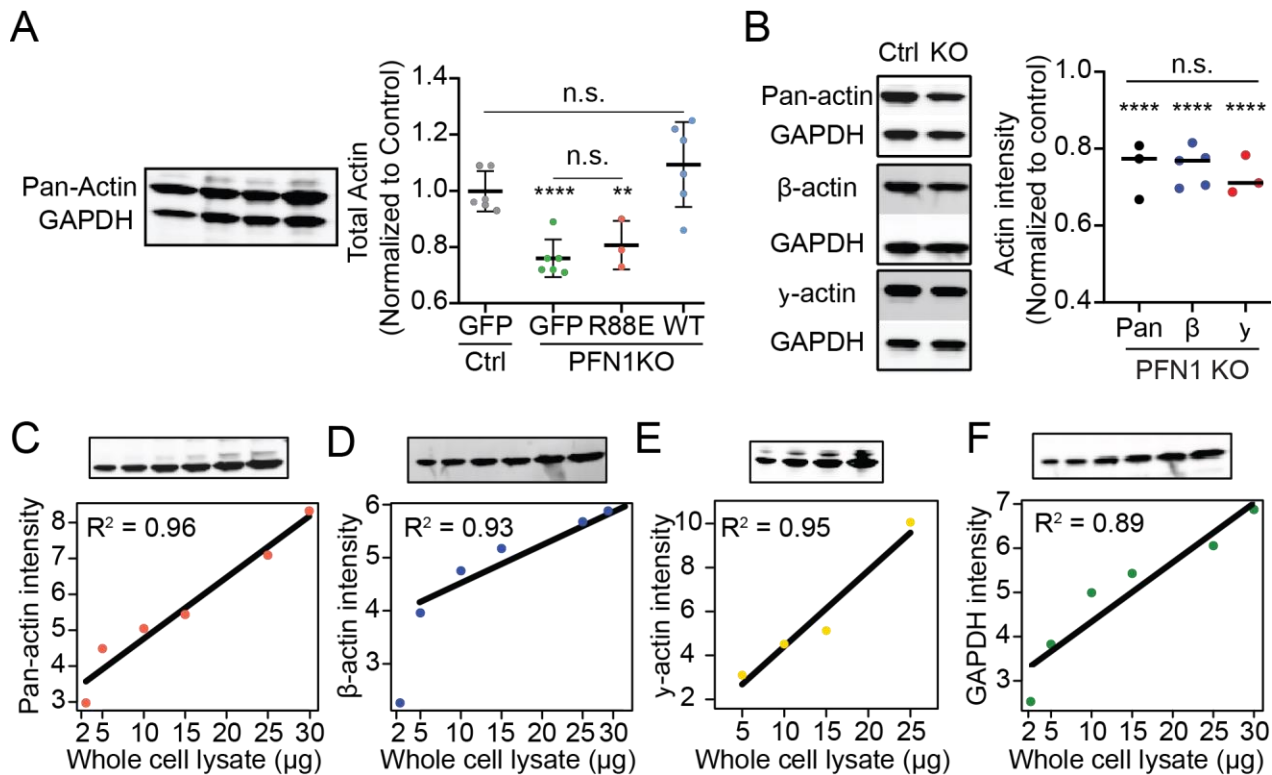

**Figure S2. Actin expression in PFN1 KO cells, related to Figure 1. (A)** Western blot analysis and quantification of pan-actin expression in control and PFN1 KO cells normalized to GAPDH as a loading control.  $n = 6$  for control + GFP, PFN1 KO + GFP, PFN<sup>WT</sup> and  $n = 3$  for PFN1 KO + PFN<sup>R88E</sup>. **(B)** Western blot analysis and quantification of pan/ $\beta$ / $\gamma$ -actin expression in PFN1 KO cells normalized to GAPDH as a loading control.  $n = 3$  for expression of pan and  $\gamma$ -actin,  $n = 5$  for  $\beta$ -actin expression. **(C)** Western blot and quantification of linearity of pan-actin signal. From left to right 2.5, 5, 10, 15, 25, 30 $\mu$ g of whole cell lysate **(D)** Western blot and quantification of linearity of  $\beta$ -actin signal. From left to right 2.5, 5, 10, 15, 25, 30 $\mu$ g of whole cell lysate. **(E)** Western blot and quantification of linearity of  $\gamma$ -actin signal. From left to right 5, 10, 15, 25 $\mu$ g of whole cell lysate **(F)** Western blot and quantification of linearity of GAPDH signal. From left to right 2.5, 5, 10, 15, 25 $\mu$ g of whole cell lysate.

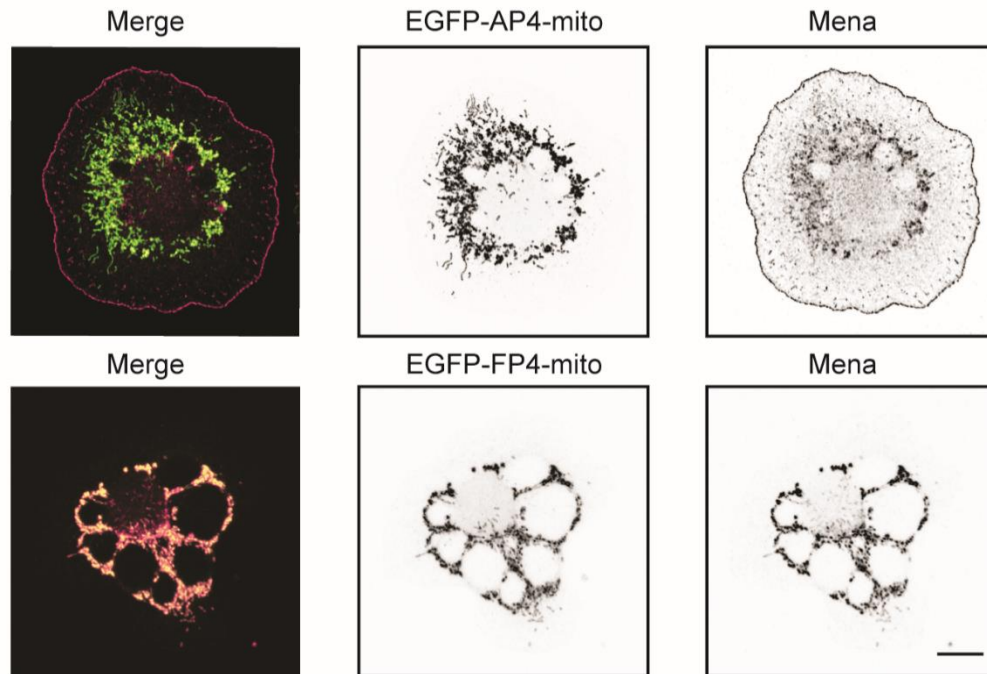

**Figure S3. Expression of EGFP-FP4-Mito construct sequesters Mena/VASP, related to Figures 3,5,7.** Representative images of PFN1 KO cells expressing EGFP-FP4-mito or EGFP-AP4-mito and immuno-stained for Mena. Scale bar is 10  $\mu$ m.

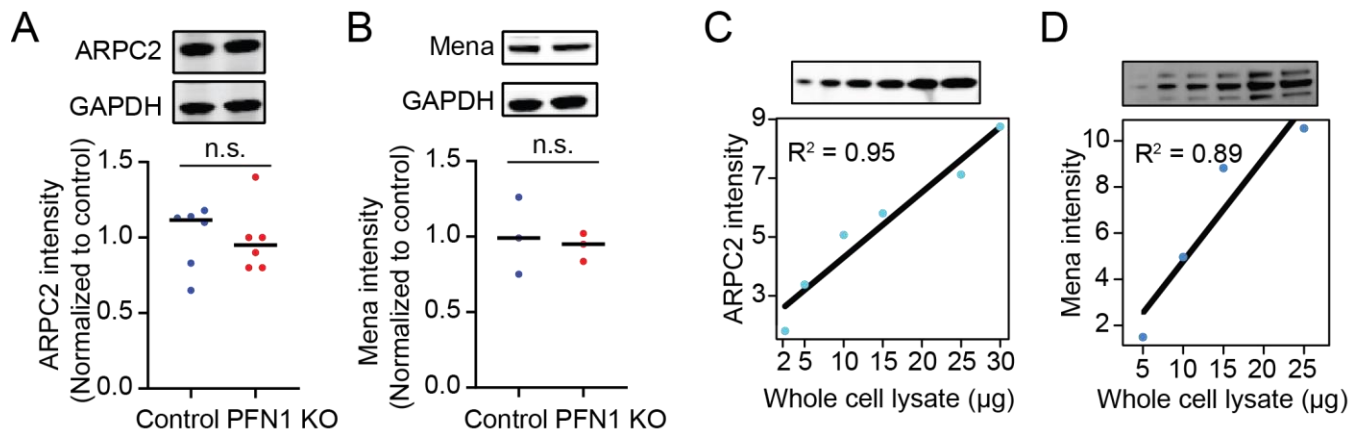

**Figure S4. Mena and ARPC2 expression in PFN1 KO cells, related to Figure 4. (A)** Western blot and quantification of ARPC2 in control and PFN1 KO cells normalized to GAPDH as a loading control. N=6 for both control and PFN1 KO. **(B)** Western blot of Mena in control and PFN1 KO cells normalized to GAPDH as a loading control. N = 3 for both control and PFN1 KO. **(C)** Western blot and quantification of linearity of ARPC2 signal. From left to right 2.5, 5, 10, 15, 25 $\mu\text{g}$  of whole cell lysate **(D)** Western blot and quantification of linearity of Mena signal. From left to right 2.5, 5, 10, 15, 25 $\mu\text{g}$  of whole cell lysate. The signal from 2.5 $\mu\text{g}$  was weak and thus not used.

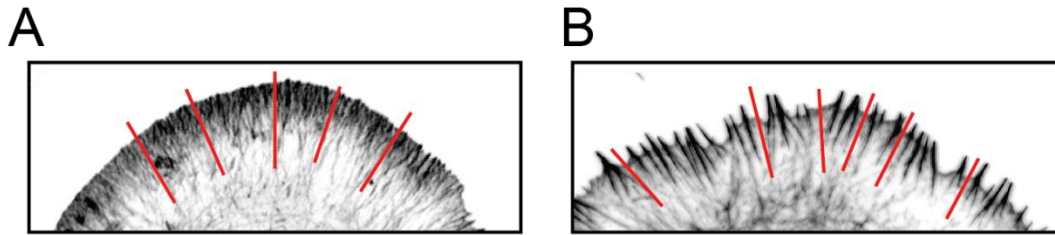

**Figure S5. Diagram illustrating how measurements were made for linescans in the absence (A) and presence (B) of filopodia or linear arrays, related to Figures 2G, 5L, 6H, 7B,E. (A)** Lines were drawn perpendicular to the leading edge of the cell to measure actin intensity in the lamellipodia in the absence of filopodia-like protrusions. **(B)** Lines were drawn perpendicular to the leading edge of the cell and in between protrusions when present.

|  | Gene                                                | Symbol | logFC  | PValue  |
|--|-----------------------------------------------------|--------|--------|---------|
|  | Arp2/3 Complex subunit 1b                           | Arpc1b | 0.290  | 1.6E-07 |
|  | Arp2/3 Complex subunit 2                            | Arpc2  | 0.056  | 2.7E-01 |
|  | Arp2/3 Complex subunit 3                            | Arpc3  | 0.103  | 9.5E-02 |
|  | Arp2/3 Complex subunit 4                            | Arpc4  | 0.102  | 4.3E-02 |
|  | Arp2/3 Complex subunit 5                            | Arpc5  | 0.167  | 1.0E-03 |
|  | Capping Actin Protein                               | Capza1 | -0.109 | 2.3E-01 |
|  | Capping Actin Protein                               | Capza2 | -0.129 | 3.5E-02 |
|  | Capping Actin Protein                               | Capzb  | -0.036 | 4.5E-01 |
|  | Cell Division Cycle 42                              | Cdc42  | 0.038  | 4.5E-01 |
|  | Cofilin-1                                           | Cfl1   | -0.212 | 1.2E-05 |
|  | Calponin-1                                          | Cnn1   | 0.272  | 8.6E-01 |
|  | Coronin 1A                                          | Coro1a | 0.126  | 3.8E-01 |
|  | Coronin 1B                                          | Coro1b | 0.115  | 2.6E-02 |
|  | Cortactin                                           | Ctnn   | 0.147  | 4.4E-03 |
|  | Dishevelled Associated Activator of Morphogenesis 1 | Daam1  | 0.196  | 7.7E-03 |
|  | Diaphanous Related Formin 1                         | Diap1  | 0.379  | 5.1E-08 |
|  | Diaphanous Related Formin 2                         | Diap2  | 0.255  | 7.7E-03 |
|  | Diaphanous Related Formin 3                         | Diap3  | 0.028  | 6.1E-01 |
|  | Destrin, actin depolymerizing factor                | Dstn   | 0.187  | 1.7E-04 |
|  | Enah                                                | Enah   | -0.051 | 3.4E-01 |
|  | Enah/Vasp-Like                                      | Evl    | -0.165 | 3.8E-03 |
|  | Ezrin                                               | Ezr    | -0.062 | 3.6E-01 |
|  | Formin Homology 2 Domain Containing 1               | Fhod1  | 0.431  | 1.9E-06 |
|  | Formin Like 1                                       | Fmnl1  | -0.033 | 5.9E-01 |
|  | Formin Like 2                                       | Fmnl2  | 0.061  | 2.7E-01 |
|  | Formin Like 3                                       | Fmnl3  | -0.077 | 2.6E-01 |
|  | Gelsolin                                            | Gsn    | 0.777  | 3.7E-17 |
|  | Inverted formin-2                                   | Inf2   | 0.456  | 8.7E-12 |
|  | Junction Mediating And Regulatory Protein           | Jmy    | 0.063  | 3.4E-01 |
|  | Myocardin Related (MAL)                             | Mkl1   | 0.088  | 0.15679 |
|  | Profilin-2                                          | Pfn2   | 0.228  | 2.9E-05 |
|  | Tropomyosin1                                        | Tpm1   | -0.120 | 8.2E-02 |
|  | Twinfilin-1                                         | Twf1   | -0.137 | 3.4E-02 |
|  | Twinfilin-2                                         | Twf2   | 0.154  | 5.8E-02 |
|  | Vasodilator Stimulated Phosphoprotein               | Vasp   | -0.004 | 9.4E-01 |
|  | Vinculin                                            | Vcl    | -0.261 | 7.2E-07 |
|  | Vimentin                                            | Vim    | 0.238  | 1.4E-06 |
|  | Wiskott-Aldrich syndrome protein family member 1    | Wasf1  | -0.240 | 6.9E-05 |
|  | WD Repeat Domain 1                                  | Wdr11  | 0.026  | 0.66484 |
|  | Zyxin                                               | Zyx    | 0.184  | 9.8E-03 |

**Table S1. Genes of actin binding proteins with no expression change between control and PFN1 KO CAD cells, related to Figure 1. Criteria for differential expression of genes: logFC >±0.5 and a p value of <0.0001**

| Gene                                              | Symbol | logFC | PValue   |
|---------------------------------------------------|--------|-------|----------|
| Cordon-bleu WH2 repeat                            | Cobll1 | +0.89 | 1.45E-47 |
| Gelsolin                                          | Gsn    | +0.78 | 3.67E-17 |
| Was/Wasl 1                                        | Wipf1  | +0.71 | 1.07E-12 |
| Arp2/3 Complex subunit 5-like                     | Arpc5l | +0.56 | 1.05E-18 |
| Villin-1                                          | Vil1   | +0.55 | 4.84E-11 |
| Formin Homology 2 Domain Containing 3             | Fhod3  | +0.55 | 1.11E-04 |
| $\beta$ -actin                                    | Actb   | -0.49 | 3.29E-26 |
| Dishevelled-associated activator of Morphogenesis | Daam2  | -0.53 | 3.38E-23 |
| Thymosin $\beta$ -4                               | Tmsb4x | -0.94 | 7.63E-49 |
| Gamma-actin                                       | Actg1  | -1.21 | 1.50E-39 |

**Table S2. Differentially expressed genes of actin binding proteins between control and PFN1 KO cells, related to Figure 1.** Criteria for differential expression of genes: logFC  $>\pm 0.5$  and a P value of  $<0.0001$
